# Supplementary material for: The Therapeutic Potential of ADAMTS8 in Lung Adenocarcinoma without Targetable Therapy
Source: MDPI journal article supplement (doi:10.3390/jpm12060902), 2022-05-30

## Supplementary file

**Supplementary Figure S1. The expression of ADAMTS family of lung adenocarcinoma in our cohort.** The expression levels of the aggrecanases or proteoglycanases (A), the procollagen N-propeptidases (B), the cartilage oligometric matrix protein-cleaving enzymes (C), the von-Willebrand Factor proteinase (D) and the Orphan enzymes (E) of in-house cohort. ns, not significant.

**Supplementary Figure S2. The expression of ADAMTS family of lung adenocarcinoma in TCGA cohort.** The expression levels of the aggrecanases or proteoglycanases (A), the procollagen N-propeptidases (B), the cartilage oligometric matrix protein-cleaving enzymes (C), the von-Willebrand Factor proteinase (D) and the Orphan enzymes (E) of TCGA cohort. ns, not significant.

**Supplementary Figure S3. The predicted miRs of ADAMTS8.** The correlation of ADAMTS8 and ten miRs.

## A. The aggrecanases or proteoglycanases

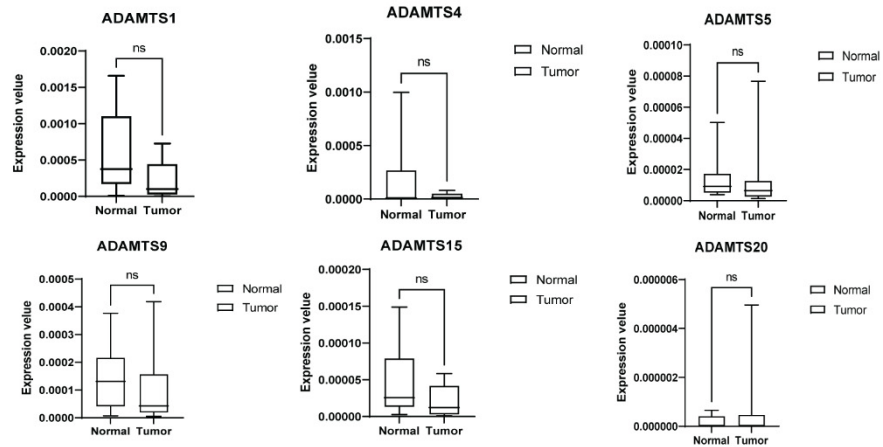

## B. The procollagen N-propeptidases

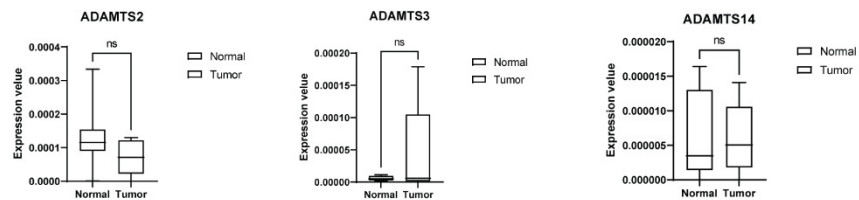

## C. The cartilage oligomeric matrix protein-cleaving enzymes

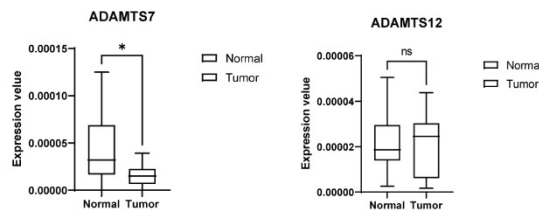

## D. The von-Willebrand Factor proteinase

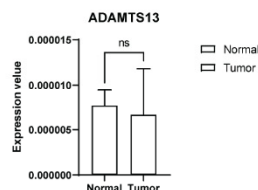

## E. Orphan enzymes

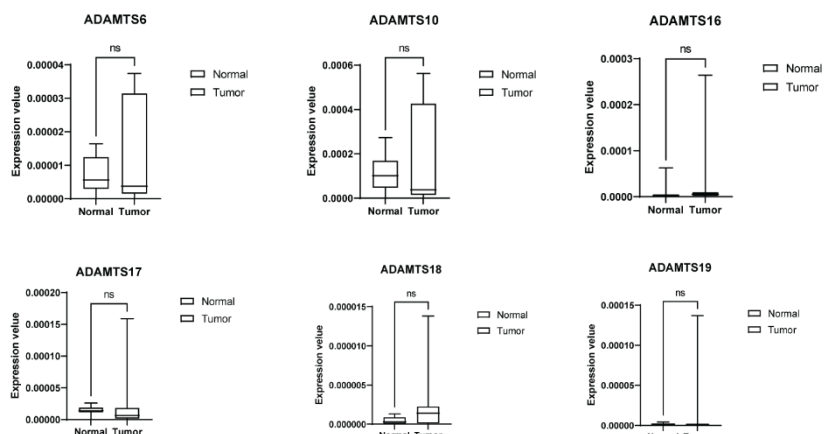

## A. The aggrecanases or proteoglycanases

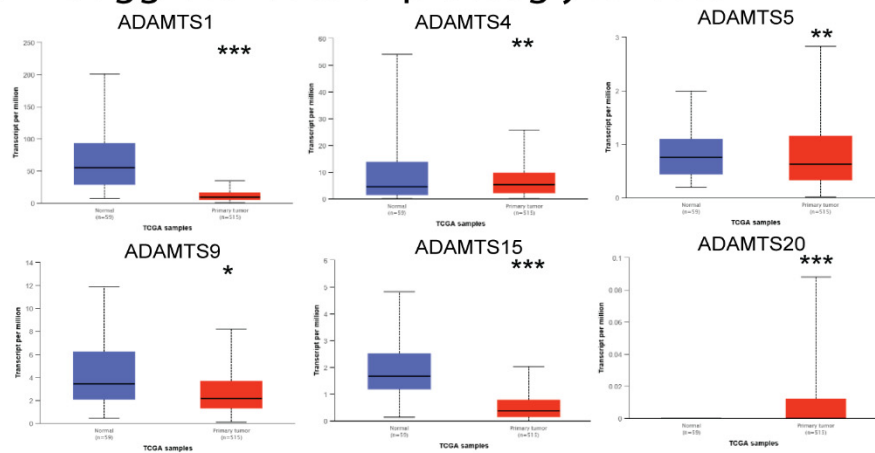

## B. The procollagen N-propeptidases

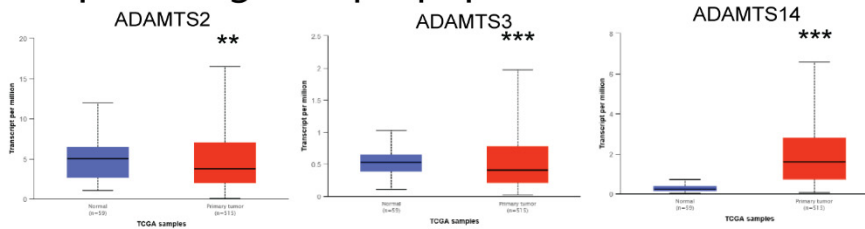

## C. The cartilage oligomeric matrix protein-cleaving enzymes

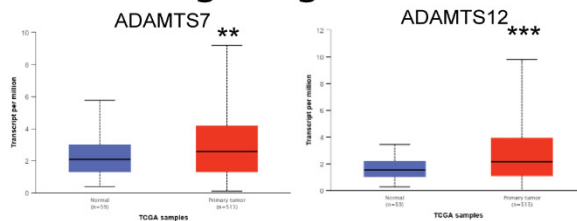

## D. The von-Willebrand Factor proteinase

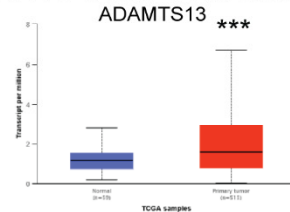

## E. Orphan enzymes

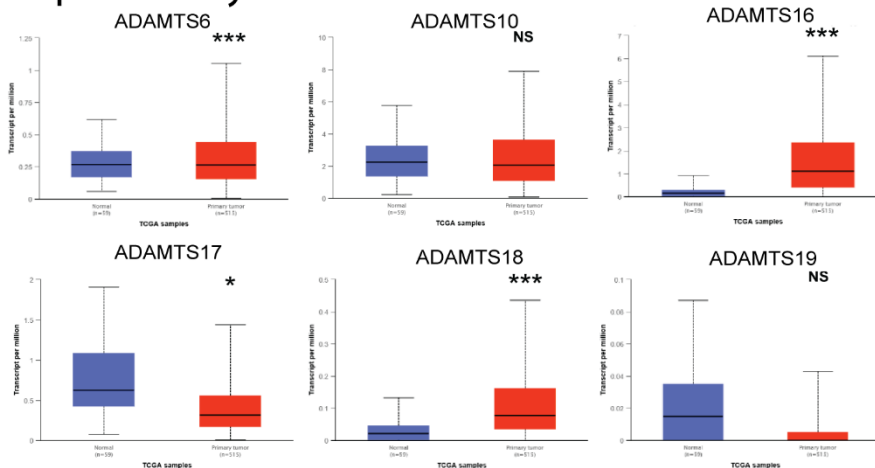

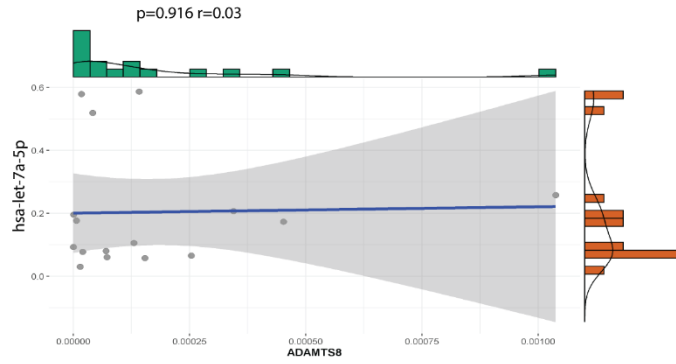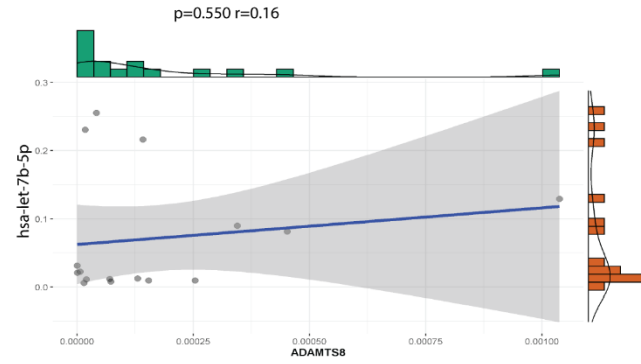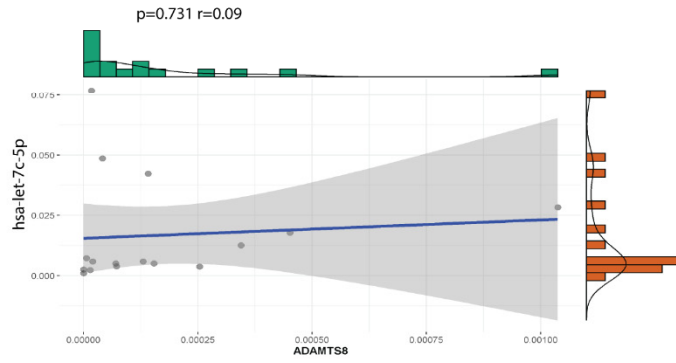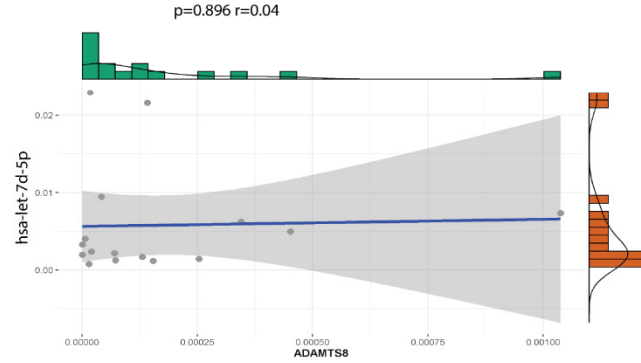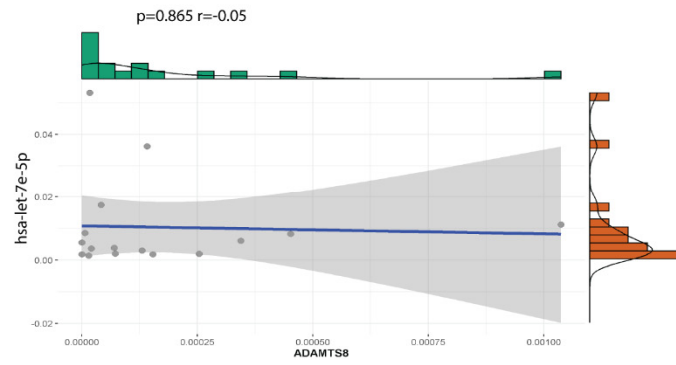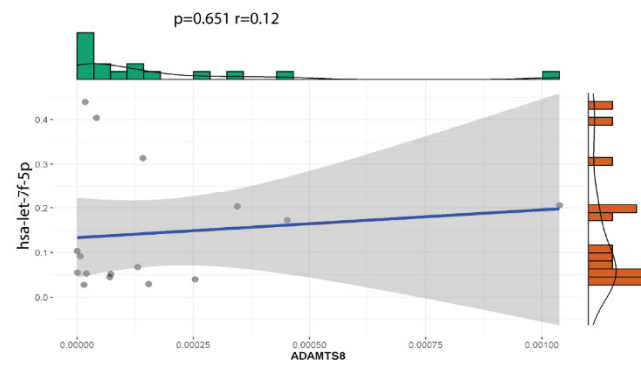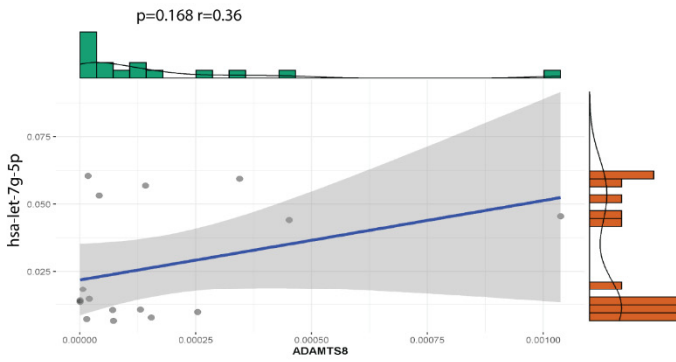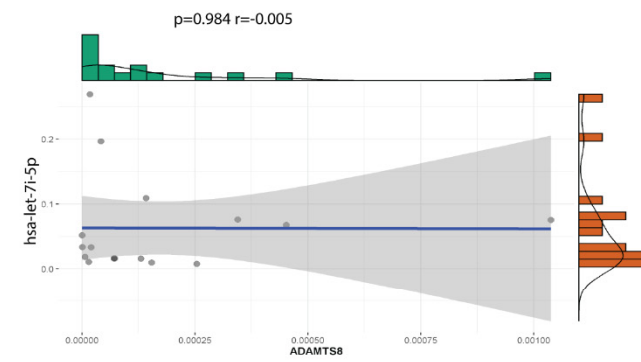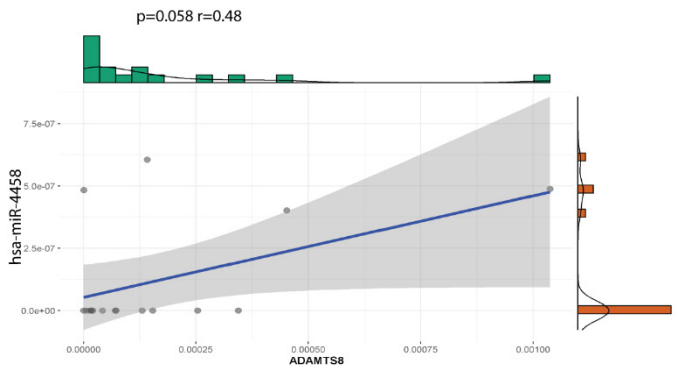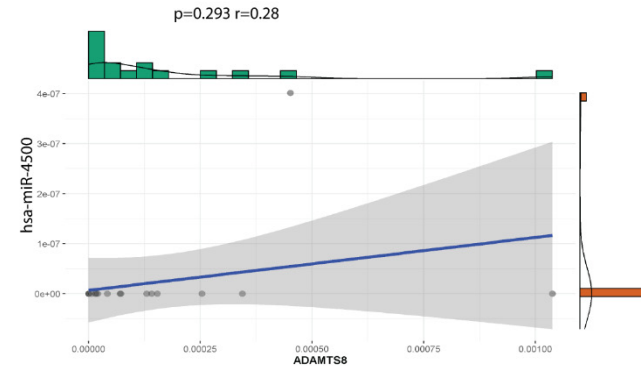

Supplement: s1 [file s1]
